# Supplementary material for: Nitrosylated Hemoglobin Levels in Human Venous Erythrocytes Correlate with Vascular Endothelial Function Measured by Digital Reactive Hyperemia
Source: PubMed Central journal article supplement (PMC3794924; doi:10.1371/journal.pone.0076457), 2013-10-10

Figure S3

A

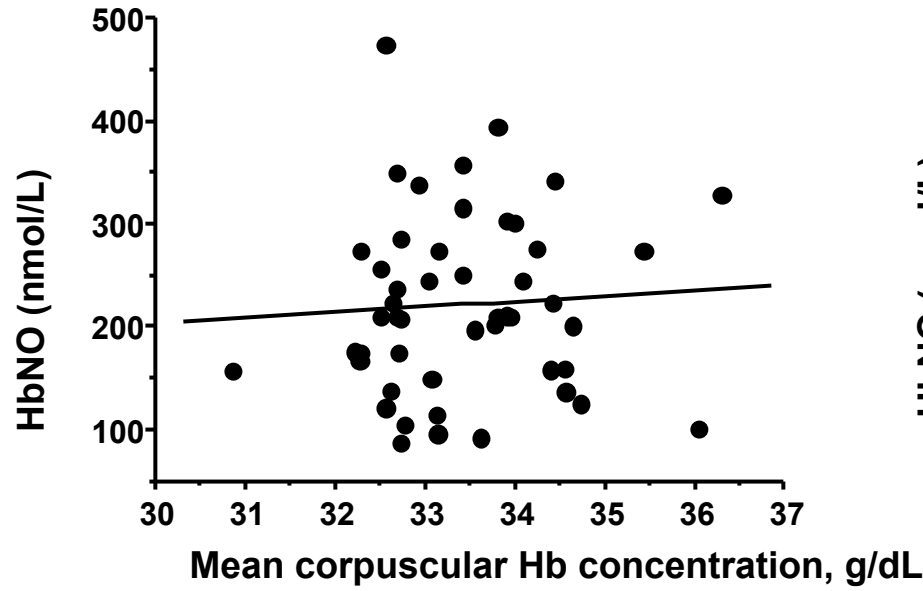

B

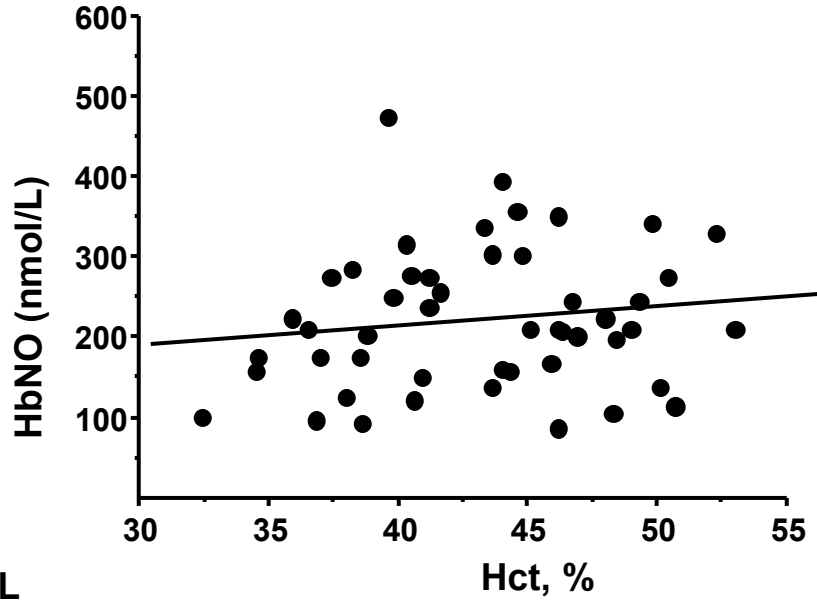

Supplement: pone.0076457.s003.pdf [file pone.0076457.s003.pdf]
